# Supplementary material for: Monolayer H-MoS2 with high ion mobility as a promising anode for rubidium (cesium)-ion batteries
Source: Royal Society of Chemistry journal article supplement (doi:10.1039/d2na00001f), 2022-01-01
Supplement: d2na00001f1.pdf [file d2na00001f1.pdf]

# Electronic Supporting Information

## Monolayer *H*-MoS<sub>2</sub> with High Ion Mobility as A Promising Anode for Rubidium (Cesium)-Ion Batteries

Baichuan Lu <sup>a</sup>, Xiaochi Liu <sup>a,b\*</sup>, Jifeng Qu <sup>a\*</sup> and Zesheng Li <sup>c</sup>

<sup>a</sup> *Center for Advanced Measurement Science, National Institute of Metrology, Beijing, 100029, China.*

<sup>b</sup> *Key Laboratory of Atomic Frequency Standards, Innovation Academy for Precision Measurement Science and Technology, Chinese Academy of Sciences, Wuhan, 430071, China*

<sup>c</sup> *Key Laboratory of Cluster Science of Ministry of Education, Beijing Key laboratory of Photoelectronic/Electro-photonic Conversion Materials, School of Chemistry and Chemical Engineering, Beijing Institute of Technology, Beijing, 100081, China*

E-mail: [liuxc@apm.ac.cn](mailto:liuxc@apm.ac.cn)

E-mail: [qujf@nim.ac.cn](mailto:qujf@nim.ac.cn)

**Table S1.** The diffusion barrier (eV) and diffusion constant ( $T=300$  K) of  $\text{MX}_2$  and graphene for Rb and Cs.

| Monolayer                    | Rb        |          |            |          | Cs        |          |            |          |
|------------------------------|-----------|----------|------------|----------|-----------|----------|------------|----------|
|                              | Pathway-I |          | Pathway-II |          | Pathway-I |          | Pathway-II |          |
|                              | Barrier   | Constant | Barrier    | Constant | Barrier   | Constant | Barrier    | Constant |
| <i>H</i> -MoS <sub>2</sub>   | 0.037     | 2.39E-01 | 0.243      | 8.28E-05 | 0.036     | 2.48E-01 | 0.203      | 3.89E-04 |
| <i>H</i> -MoSe <sub>2</sub>  | 0.039     | 2.21E-01 | 0.237      | 1.04E-04 | 0.039     | 2.21E-01 | 0.196      | 5.10E-04 |
| <i>H</i> -MoTe <sub>2</sub>  | 0.042     | 1.97E-01 | 0.175      | 1.15E-03 | 0.042     | 1.97E-01 | 0.134      | 5.61E-03 |
| <i>H</i> -WS <sub>2</sub>    | 0.052     | 1.34E-01 | 0.253      | 5.62E-05 | 0.050     | 1.45E-01 | 0.221      | 1.94E-04 |
| <i>H</i> -WSe <sub>2</sub>   | 0.052     | 1.34E-01 | 0.241      | 8.94E-05 | 0.051     | 1.39E-01 | 0.222      | 1.86E-04 |
| <i>H</i> -WTe <sub>2</sub>   | 0.054     | 1.24E-01 | 0.239      | 9.66E-05 | 0.055     | 1.19E-01 | 0.211      | 2.85E-04 |
| <i>T'</i> - MoS <sub>2</sub> | 0.122     | 8.92E-03 | 0.450      | 2.76E-08 | 0.091     | 2.96E-02 | 0.411      | 1.25E-07 |
| Graphene                     | 0.043     | 1.90E-01 | 0.048      | 1.56E-01 | 0.033     | 2.79E-01 | 0.037      | 2.39E-01 |

**Table S2.** Structural information obtained by PBE-D3 functional for graphene and monolayer  $\text{MX}_2$  (M=Mo, W; X=S, Se and Te) systems. The Lattice Constants  $a$ ,  $b$  and  $h$  (height).

| Monolayer                               | $a$ ( $b$ )/Å | $h$ /Å |
|-----------------------------------------|---------------|--------|
| <i>H</i> -MoS <sub>2</sub>              | 3.167         | 3.134  |
| <i>H</i> -MoSe <sub>2</sub>             | 3.310         | 3.339  |
| <i>H</i> -MoTe <sub>2</sub>             | 3.479         | 3.655  |
| <i>H</i> -WS <sub>2</sub>               | 3.185         | 3.134  |
| <i>H</i> -WSe <sub>2</sub>              | 3.331         | 3.336  |
| <i>H</i> -WTe <sub>2</sub>              | 3.558         | 3.606  |
| <i>T</i> ( <i>T'</i> )-MoS <sub>2</sub> | 3.209         | 3.141  |
| Graphene                                | 2.468         | /      |

**Table S3.** The binding energy (eV) of M-top, X-top and hollow sites of  $\text{MX}_2$  to Rb and Cs.

| MX <sub>2</sub>              | Rb@MX <sub>2</sub> |       |        | Cs@MX <sub>2</sub> |       |        |
|------------------------------|--------------------|-------|--------|--------------------|-------|--------|
|                              | M-top              | X-top | Hollow | M-top              | X-top | Hollow |
| <i>H</i> -MoS <sub>2</sub>   | -0.96              | -0.72 | -0.94  | -1.17              | -0.97 | -1.14  |
| <i>H</i> -MoSe <sub>2</sub>  | -0.72              | -0.46 | -0.67  | -0.94              | -0.74 | -0.9   |
| <i>H</i> -MoTe <sub>2</sub>  | -0.52              | -0.33 | -0.48  | -0.74              | -0.6  | -0.7   |
| <i>H</i> -WS <sub>2</sub>    | -0.64              | -0.39 | -0.59  | -0.85              | -0.64 | -0.81  |
| <i>H</i> -WSe <sub>2</sub>   | -0.47              | -0.23 | -0.42  | -0.68              | -0.47 | -0.64  |
| <i>H</i> -WTe <sub>2</sub>   | -0.53              | -0.29 | -0.48  | -0.74              | -0.53 | -0.69  |
| <i>T'</i> - MoS <sub>2</sub> | -2.49              | -2.60 | -3.29  | -2.53              | -2.85 | -2.95  |

**Table S4.** The Rb and Cs ion charges ( $e$ ) were calculated by Bader charge scheme. The diffusion energy barrier (eV) from pathway-I of  $H$ - $MX_2$  and graphene for Rb and Cs. The  $e_s$  represents the charge on stable site. The  $e_T$  represents the charge on transition site. The  $\Delta e_d$  represents the charge difference between  $e_T$  and  $e_s$  ( $\Delta e_d = e_T - e_s$ ).

| $H$ - $MX_2$           | Rb@ $H$ - $MX_2$ |        |        |              | Cs@ $H$ - $MX_2$ |        |        |              |
|------------------------|------------------|--------|--------|--------------|------------------|--------|--------|--------------|
|                        | Barrier          | $e_s$  | $e_T$  | $\Delta e_d$ | Barrier          | $e_s$  | $e_T$  | $\Delta e_d$ |
| $H$ -MoS <sub>2</sub>  | 0.037            | 0.8788 | 0.8819 | 0.0031       | 0.036            | 0.8767 | 0.8810 | 0.0043       |
| $H$ -MoSe <sub>2</sub> | 0.039            | 0.8549 | 0.8597 | 0.0048       | 0.039            | 0.8557 | 0.8618 | 0.0061       |
| $H$ -MoTe <sub>2</sub> | 0.042            | 0.8292 | 0.8368 | 0.0076       | 0.042            | 0.8259 | 0.8349 | 0.0090       |
| $H$ -WS <sub>2</sub>   | 0.052            | 0.8748 | 0.8796 | 0.0048       | 0.050            | 0.8757 | 0.8851 | 0.0094       |
| $H$ -WSe <sub>2</sub>  | 0.052            | 0.8542 | 0.8597 | 0.0055       | 0.051            | 0.8535 | 0.8649 | 0.0114       |
| $H$ -WTe <sub>2</sub>  | 0.054            | 0.8359 | 0.8452 | 0.0093       | 0.055            | 0.8273 | 0.8417 | 0.0144       |

**Table S5.** The average binding energy (eV) of different layers of adsorption Rb on  $H$ - $MX_2$  and graphene. The corresponding storage density (atom/Å<sup>2</sup>), theoretical capacity (mAh/g) and open circuit voltage (V) of the optimal adsorption system. The \* indicating the amount of Rb adsorption.

| Materials              | E <sub>b</sub> (*Rb@M <sub>9</sub> X <sub>18</sub> ) |           |            |            |            |            | Storage Density | Theoretical Capacity | OCV  |
|------------------------|------------------------------------------------------|-----------|------------|------------|------------|------------|-----------------|----------------------|------|
|                        | @1L (*=4)                                            | @2L (*=8) | @3L (*=12) | @4L (*=16) | @5L (*=20) | @6L (*=24) |                 |                      |      |
| $H$ -MoS <sub>2</sub>  | -0.48                                                | -0.24     | -0.10      | -0.10      | -0.03      | 0.07       | 0.23            | 372.05               | 0.96 |
| $H$ -MoSe <sub>2</sub> | -0.41                                                | -0.18     | -0.07      | -0.01      | 0.05       | /          | 0.18            | 187.72               | 0.72 |
| $H$ -MoTe <sub>2</sub> | -0.48                                                | -0.27     | 0.05       | /          | /          | /          | 0.08            | 67.84                | 0.52 |
| $H$ -WS <sub>2</sub>   | -0.38                                                | -0.15     | 0.04       | /          | /          | /          | 0.10            | 96.08                | 0.64 |
| $H$ -WSe <sub>2</sub>  | -0.34                                                | -0.10     | 0.02       | /          | /          | /          | 0.09            | 69.72                | 0.47 |
| $H$ -WTe <sub>2</sub>  | -0.46                                                | -0.21     | 0.00       | /          | /          | /          | 0.08            | 54.26                | 0.53 |
| Materials              | E <sub>b</sub> (*Rb@C <sub>32</sub> )                |           |            |            |            |            | Storage Density | Theoretical capacity | OCV  |
|                        | @1L                                                  |           |            | @2L        |            |            |                 |                      |      |
| Graphene               | *=1                                                  | *=2       | *=3        | *=4        | *=2        | *=4        | 0.01            | 69.79                | 0.01 |
|                        | -0.01                                                | 0.04      | 0.02       | 0.02       | 0.05       | 0.02       |                 |                      |      |

**Table S6.** The average binding energy (eV) of different layers of adsorption Cs on *H*-MX<sub>2</sub> and graphene. The corresponding Storage density (atom/Å<sup>2</sup>), theoretical capacity (mAh/g) and open circuit voltage (V) of the optimal adsorption system. The \* indicating the amount of Cs adsorption.

| Materials                   | E <sub>b</sub> (*Cs@M <sub>9</sub> X <sub>18</sub> ) |                |                 |                 | Storage Density | Theoretical Capacity | OCV  |
|-----------------------------|------------------------------------------------------|----------------|-----------------|-----------------|-----------------|----------------------|------|
|                             | @1L<br>(* = 4)                                       | @2L<br>(* = 8) | @3L<br>(* = 12) | @4L<br>(* = 16) |                 |                      |      |
| <i>H</i> -MoS <sub>2</sub>  | -0.43                                                | -0.20          | -0.07           | <del>0.00</del> | 0.14            | 223.23               | 1.17 |
| <i>H</i> -MoSe <sub>2</sub> | -0.40                                                | -0.16          | -0.08           | <del>0.01</del> | 0.13            | 140.79               | 0.94 |
| <i>H</i> -MoTe <sub>2</sub> | -0.38                                                | -0.18          | <del>0.01</del> | /               | 0.08            | 67.84                | 0.74 |
| <i>H</i> -WS <sub>2</sub>   | -0.32                                                | -0.10          | <del>0.01</del> | /               | 0.10            | 96.08                | 0.85 |
| <i>H</i> -WSe <sub>2</sub>  | -0.28                                                | -0.08          | <del>0.04</del> | /               | 0.09            | 69.72                | 0.68 |
| <i>H</i> -WTe <sub>2</sub>  | -0.58                                                | -0.28          | <del>0.00</del> | /               | 0.08            | 54.26                | 0.74 |
| Materials                   | E <sub>b</sub> (*Cs@C <sub>32</sub> )                |                |                 |                 | Storage Density | Theoretical Capacity | OCV  |
|                             | @1L                                                  |                | @2L             |                 |                 |                      |      |
| Graphene                    | * = 1                                                | * = 2          | * = 3           | * = 2           | 0.02            | 139.59               | 0.19 |
|                             | -0.19                                                | -0.05          | <del>0.02</del> | <del>0.03</del> |                 |                      |      |

**Table S7.** The charge (e) of \*Rb@*H*-MoS<sub>2</sub> and \*Cs@*H*-MoS<sub>2</sub> obtained from Bader charge transfer. The (+) and (-) numbers indicate the positive charge (lost electrons) and the negative charge (get electrons) on each layer of \*Rb@*H*-MoS<sub>2</sub> and \*Cs@*H*-MoS<sub>2</sub>, respectively. And the (-) bold number indicates the negative charge (get electrons) carried on the *H*-MoS<sub>2</sub> of \*Rb@*H*-MoS<sub>2</sub> and \*Cs@*H*-MoS<sub>2</sub>. The structure and layer naming can be seen in Figure 2a in the main text. The \* indicating the amount of Rb/Cs adsorption.

| System           | *Rb@ <i>H</i> -MoS <sub>2</sub> |               |               |               |               | *Cs@ <i>H</i> -MoS <sub>2</sub> |               |               |
|------------------|---------------------------------|---------------|---------------|---------------|---------------|---------------------------------|---------------|---------------|
|                  | * = 4                           | * = 8         | * = 12        | * = 16        | * = 20        | * = 4                           | * = 8         | * = 12        |
|                  | @1L                             | @2L           | @3L           | @4L           | @5L           | @1L                             | @2L           | @3L           |
| Up-L3            |                                 |               |               |               | +0.199        |                                 |               |               |
| Up-L2            |                                 |               | +0.096        | +0.084        | -0.242        |                                 |               | +0.150        |
| Up-L1            | +1.366                          | +1.433        | +1.389        | +1.406        | +1.520        | +1.399                          | +1.456        | +1.261        |
| MoS <sub>2</sub> | <b>-1.366</b>                   | <b>-2.868</b> | <b>-3.106</b> | <b>-2.981</b> | <b>-2.957</b> | <b>-1.399</b>                   | <b>-2.906</b> | <b>-2.792</b> |
| Down-L1          |                                 | +1.435        | +1.621        | +1.413        | +1.388        |                                 | +1.450        | +1.380        |
| Down-L2          |                                 |               |               | +0.078        | +0.092        |                                 |               |               |

**Table S8.** The lattice constant  $a$ ,  $b$  and  $h$  ( $\text{\AA}$ ), volume of  $H\text{-MoS}_2$  ( $\text{\AA}^3$ ), change rate (%) and theoretical capacitance (mAh/g) of pure  $H\text{-MoS}_2$  monolayer,  $*\text{Rb}@H\text{-MoS}_2$  and  $*\text{Cs}@H\text{-MoS}_2$ . The \* indicating the amount of Rb/Cs adsorption.

| $*\text{Rb}(\text{Cs})@H\text{-MoS}_2$ | Lattice Constant $a$ ( $b$ ) | Lattice Constant Change Rate | $h$ ( $H\text{-MoS}_2$ ) | Volume ( $H\text{-MoS}_2$ ) | Volume Change Rate | Theoretical Capacitance |
|----------------------------------------|------------------------------|------------------------------|--------------------------|-----------------------------|--------------------|-------------------------|
| Pure- $\text{MoS}_2$                   | 9.50                         | /                            | 3.13                     | 244.95                      | /                  | /                       |
| 1 Rb                                   | 9.63                         | 1.37%                        | 3.11                     | 249.77                      | 1.97%              | 18.60                   |
| 4 Rb                                   | 9.64                         | 1.47%                        | 3.11                     | 250.29                      | 2.18%              | 74.41                   |
| 8 Rb                                   | 9.67                         | 1.79%                        | 3.14                     | 253.88                      | 3.64%              | 148.42                  |
| 12 Rb                                  | 9.95                         | 4.74%                        | 2.99                     | 256.36                      | 4.66%              | 223.23                  |
| 16 Rb                                  | 9.95                         | 4.74%                        | 2.99                     | 257.22                      | 4.66%              | 297.64                  |
| 20 Rb                                  | 9.94                         | 4.63%                        | 3.00                     | 253.96                      | 4.80%              | 372.05                  |
| 1 Cs                                   | 9.63                         | 1.37%                        | 3.11                     | 249.61                      | 1.90%              | 18.60                   |
| 4 Cs                                   | 9.67                         | 1.79%                        | 3.10                     | 250.80                      | 2.39%              | 74.41                   |
| 8 Cs                                   | 9.74                         | 2.53%                        | 3.11                     | 255.10                      | 4.14%              | 148.42                  |
| 12 Cs                                  | 9.95                         | 4.74%                        | 3.01                     | 254.22                      | 5.36%              | 223.23                  |

**Table S9.** The binding energy (eV) of C-top, C-bridge and Hollow sites of graphene to Li, Rb and Cs.

| Alkali@Graphene | C-top | C-bridge | Hollow |
|-----------------|-------|----------|--------|
| Li              | 0.11  | 0.11     | -0.19  |
| Rb              | 0.05  | 0.05     | -0.01  |
| Cs              | -0.14 | -0.15    | -0.19  |

**Table S10.** The lattice constant  $a$ ,  $b$  and  $h$  (Å), volume of  $H$ - $MX_2$  (Å<sup>3</sup>) and volume change rate (%) of pure  $MX_2$  monolayer, \*Rb@  $MoS_2$  and \*Cs@  $MoS_2$ . The \* indicating the amount of Rb/Cs adsorption.

| Systems           | Pure-<br>MX <sub>2</sub> | *Rb@MX <sub>2</sub> |        |        |        |        | *Cs@MX <sub>2</sub> |        |        |        |        |
|-------------------|--------------------------|---------------------|--------|--------|--------|--------|---------------------|--------|--------|--------|--------|
|                   |                          | *=1                 | *=4    | *=8    | *=12   | *=16   | *=1                 | *=4    | *=8    | *=12   |        |
| MoSe <sub>2</sub> | $a$ ( $b$ )              | 9.93                | 10.01  | 10.01  | 10.04  | 10.28  | 10.27               | 10.02  | 10.05  | 10.11  | 10.14  |
|                   | $h$                      | 3.34                | 3.33   | 3.34   | 3.29   | 3.37   | 3.37                | 3.32   | 3.32   | 3.33   | 3.35   |
|                   | $V$                      | 285.21              | 288.96 | 289.82 | 287.20 | 308.41 | 307.81              | 288.66 | 290.39 | 294.76 | 298.29 |
|                   | Change rate              | /                   | 1.31%  | 1.62%  | 0.70%  | 8.14%  | 7.93%               | 1.21%  | 1.82%  | 3.35%  | 4.59%  |
| MoTe <sub>2</sub> | $a$ ( $b$ )              | 10.44               | 10.73  | 10.73  | 10.89  | /      | /                   | 10.73  | 10.75  | 10.90  | /      |
|                   | $h$                      | 3.66                | 3.58   | 3.58   | 3.77   | /      | /                   | 3.58   | 3.58   | 3.78   | /      |
|                   | $V$                      | 345.46              | 356.94 | 356.94 | 387.18 | /      | /                   | 356.94 | 358.28 | 388.92 | /      |
|                   | Change rate              | /                   | 3.32%  | 3.32%  | 12.08% | /      | /                   | 3.32%  | 3.71%  | 12.58% | /      |
| WS <sub>2</sub>   | $a$ ( $b$ )              | 9.56                | 9.61   | 9.59   | 9.58   | /      | /                   | 9.62   | 9.64   | 9.67   | /      |
|                   | $h$                      | 3.13                | 3.12   | 3.12   | 3.13   | /      | /                   | 3.12   | 3.10   | 3.16   | /      |
|                   | $V$                      | 247.73              | 249.53 | 248.49 | 248.77 | /      | /                   | 250.05 | 249.48 | 255.89 | /      |
|                   | Change rate              | /                   | 0.73%  | 0.31%  | 0.42%  | /      | /                   | 0.94%  | 0.71%  | 3.30%  | /      |
| WSe <sub>2</sub>  | $a$ ( $b$ )              | 9.99                | 10.00  | 9.97   | 9.97   | /      | /                   | 10.00  | 10.01  | 10.03  | /      |
|                   | $h$                      | 3.34                | 3.35   | 3.35   | 3.35   | /      | /                   | 3.35   | 3.35   | 3.32   | /      |
|                   | $V$                      | 288.67              | 290.11 | 288.37 | 288.37 | /      | /                   | 290.11 | 290.69 | 289.24 | /      |
|                   | Change rate              | /                   | 0.50%  | -0.10% | -0.10% | /      | /                   | 0.50%  | 0.70%  | 0.20%  | /      |
| WTe <sub>2</sub>  | $a$ ( $b$ )              | 10.67               | 10.76  | 10.74  | 10.79  | /      | /                   | 10.76  | 10.77  | 10.75  | /      |
|                   | $h$                      | 3.61                | 3.60   | 3.60   | 4.21   | /      | /                   | 3.59   | 3.59   | 4.22   | /      |
|                   | $V$                      | 355.92              | 360.95 | 359.61 | 424.47 | /      | /                   | 359.95 | 360.61 | 422.33 | /      |
|                   | Change rate              | /                   | 1.41%  | 1.04%  | 19.26% | /      | /                   | 1.13%  | 1.32%  | 18.66% | /      |

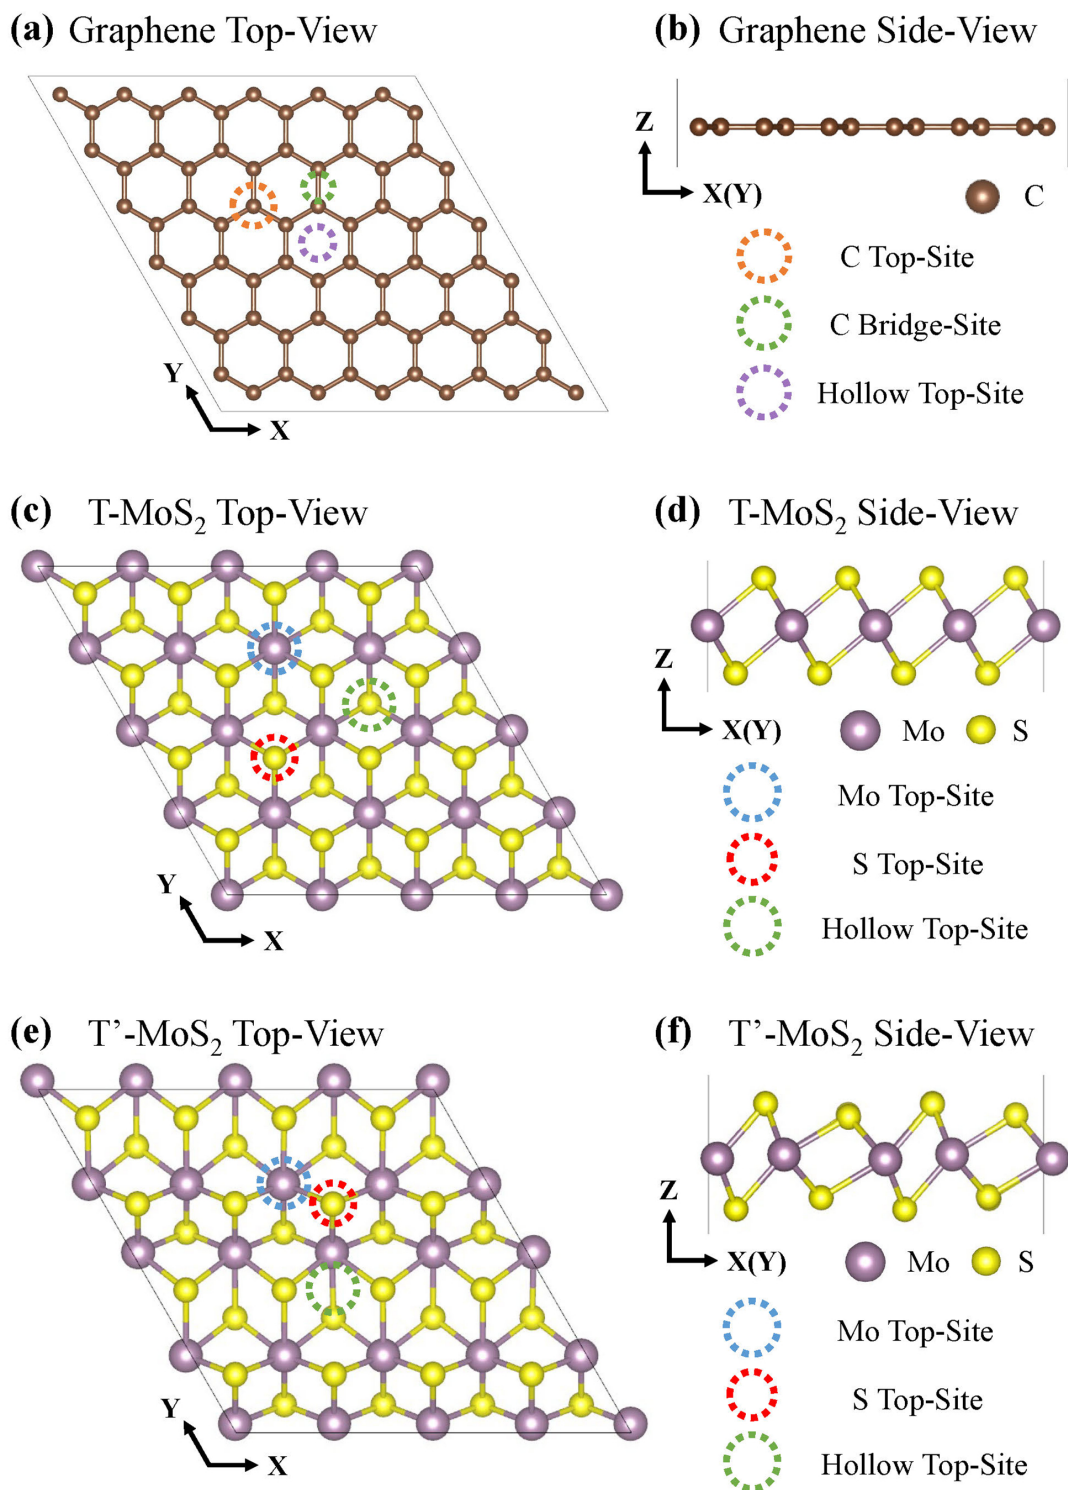

**Figure S1** The (a) top and (b) side views of the atomic structure of the  $6 \times 6 \times 1$  graphene supercell. The (c) top and (d) side views of the atomic structure of the  $4 \times 4 \times 1$  monolayer  $T$ -MoS<sub>2</sub> supercell. The (e) top and (f) side views of the atomic structure of the  $4 \times 4 \times 1$  monolayer  $T'$ -MoS<sub>2</sub> supercell.

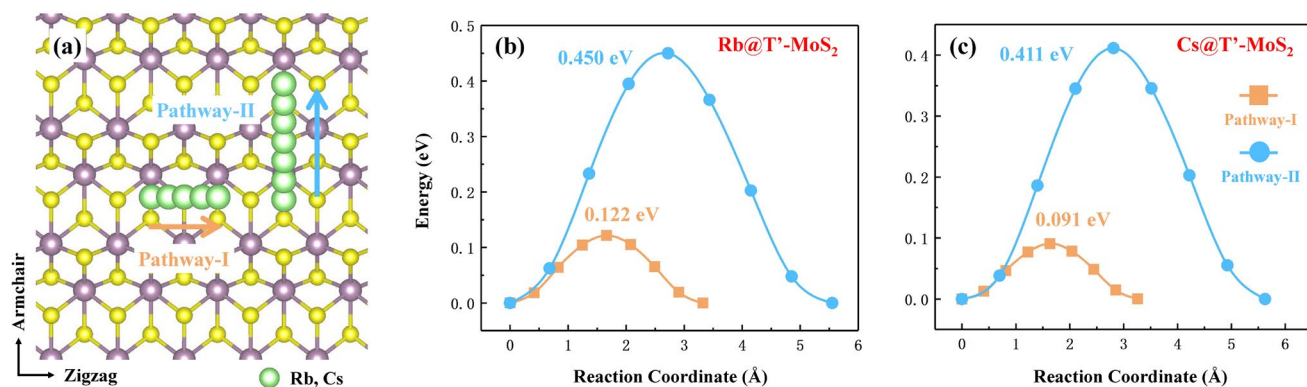

**Figure S2** (a) The two universal diffusion pathways (pathway-I along zigzag and pathways-II along armchair direction) for Rb and Cs ions diffusing on  $T'$ -MoS<sub>2</sub> monolayer. Diffusion energy curves of (b) Rb and (c) Cs ions on  $T'$ -MoS<sub>2</sub> monolayer.

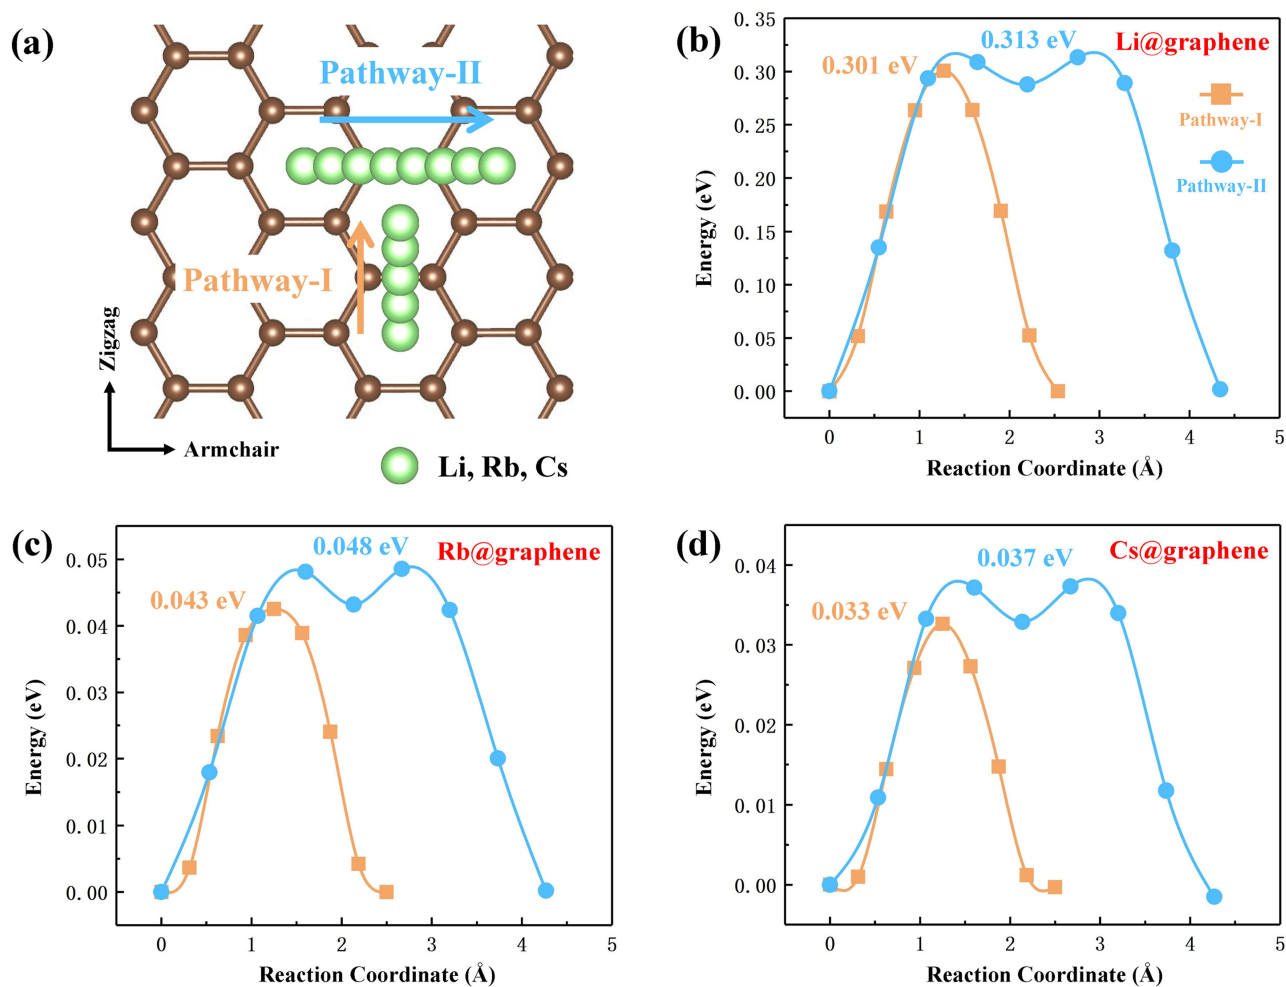

**Figure S3** (a) The two universal diffusion pathways (pathway-I along zigzag and pathways-II along armchair direction) for Li, Rb and Cs ions diffusing on graphene. Diffusion energy curves of (b) Li, (c) Rb and (d) Cs ions on graphene.



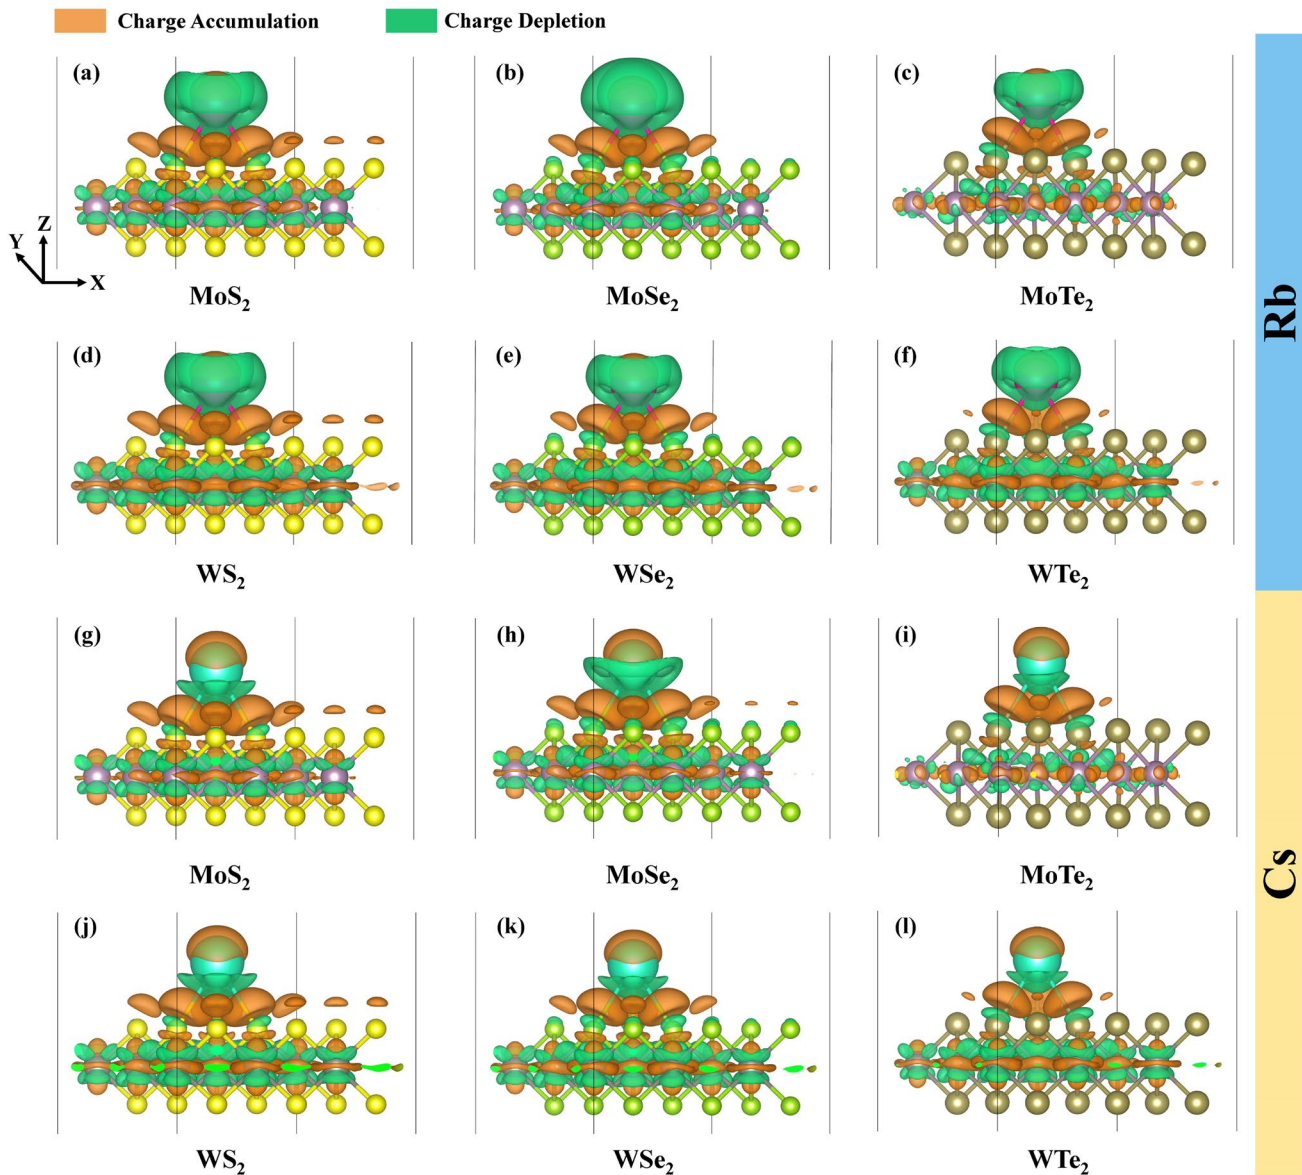

**Figure S4.** Difference charge density of Rb at the stable adsorption site (M-top) of monolayer (a) *H*-MoS<sub>2</sub>, (b) *H*-MoSe<sub>2</sub>, (c) *H*-MoTe<sub>2</sub>, (d) *H*-WS<sub>2</sub>, (e) *H*-WSe<sub>2</sub>, (f) *H*-WTe<sub>2</sub>. Difference charge density of Cs at the stable adsorption site (M-top) of monolayer (g) *H*-MoS<sub>2</sub>, (h) *H*-MoSe<sub>2</sub>, (i) *H*-MoTe<sub>2</sub>, (j) *H*-WS<sub>2</sub>, (k) *H*-WSe<sub>2</sub> and (l) *H*-WTe<sub>2</sub>. Orange and green colors with the isosurface value of 0.001 e/A<sup>3</sup>, represent charge accumulation and depletion, respectively.

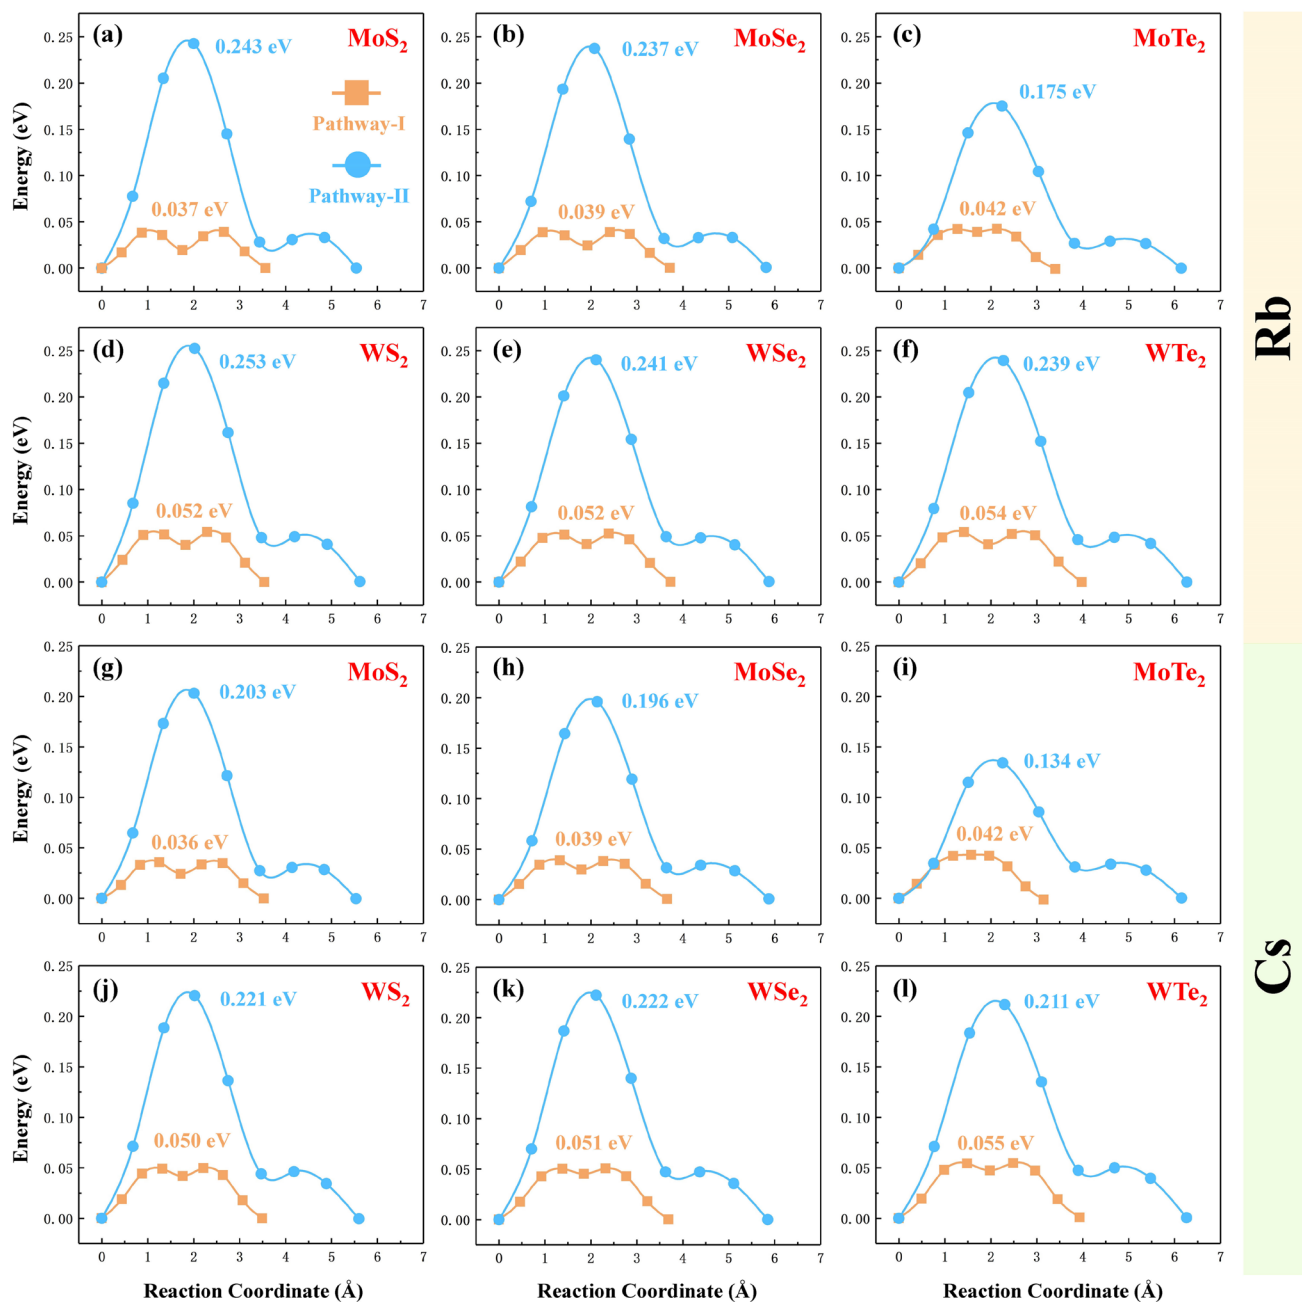

**Figure S5.** The diffusion energy curves of two universal pathways (pathway-I along zigzag and pathways-II along armchair direction) for (a) Rb@H-MoS<sub>2</sub>, (b) Rb@H-MoSe<sub>2</sub>, (c) Rb@H-MoTe<sub>2</sub>, (d) Rb@H-WS<sub>2</sub>, (e) Rb@H-WSe<sub>2</sub>, (f) Rb@H-WTe<sub>2</sub>, (g) Cs@H-MoS<sub>2</sub>, (h) Cs@H-MoSe<sub>2</sub>, (i) Cs@H-MoTe<sub>2</sub>, (j) Cs@H-WS<sub>2</sub>, (k) Cs@H-WSe<sub>2</sub> and (l) Cs@H-WTe<sub>2</sub>.

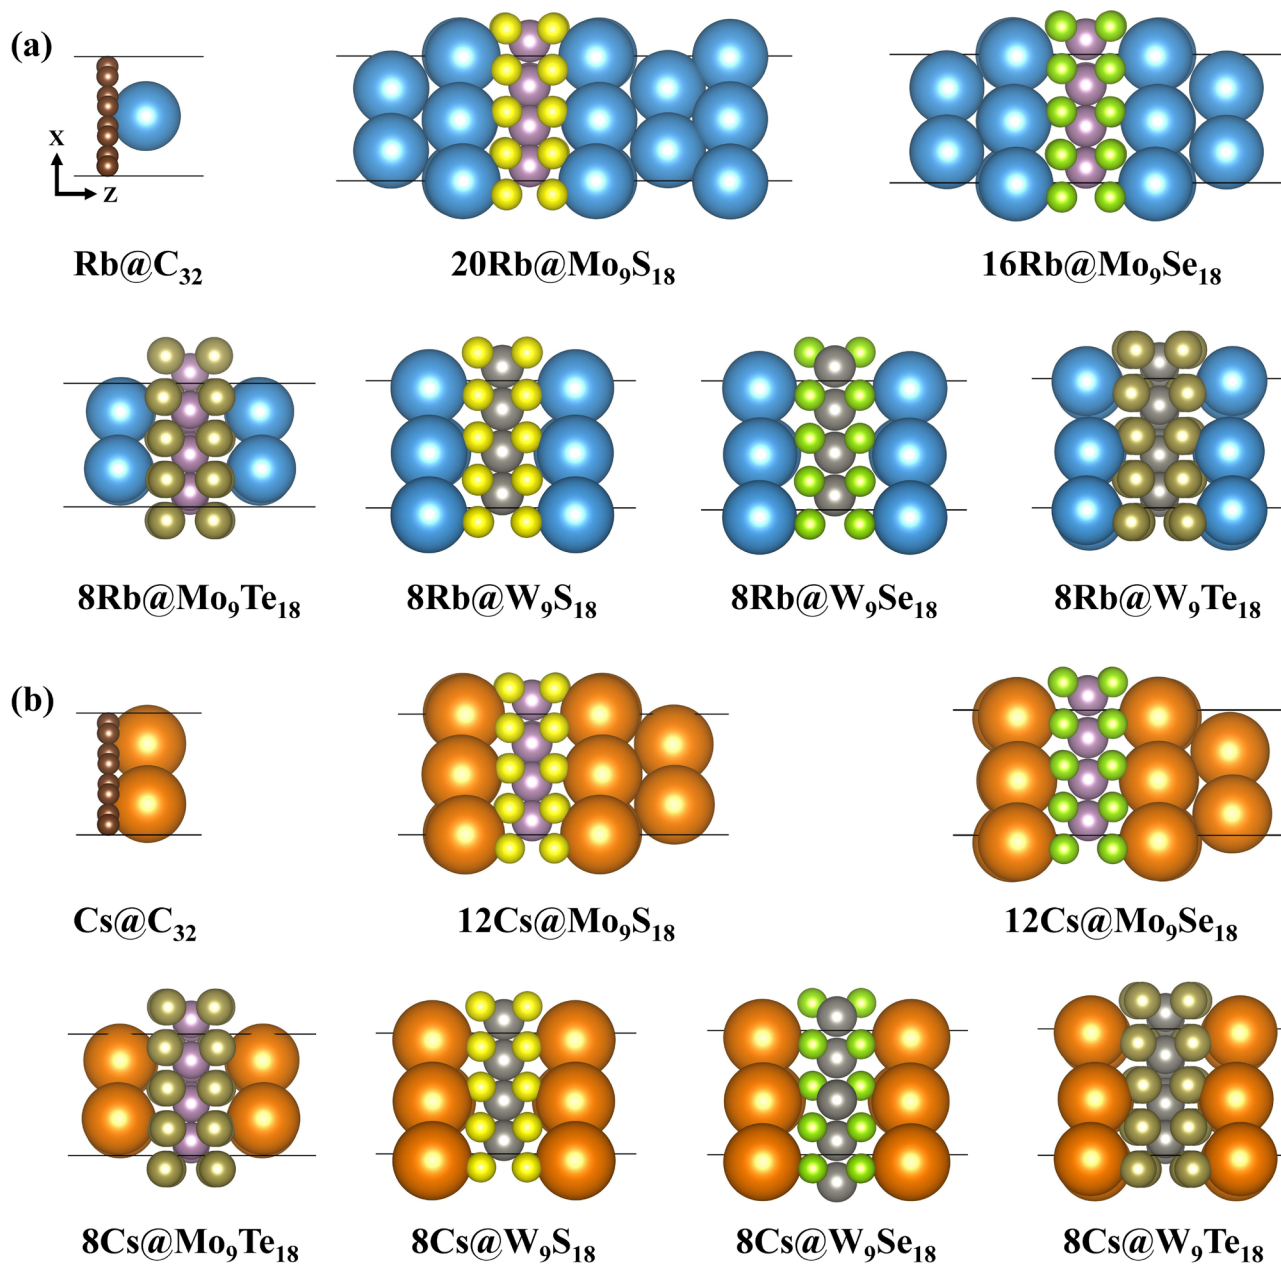

**Figure S6** Schematic diagram of the maximum adsorption capacity of  $3\times 3\times 1$   $H$ -MX<sub>2</sub> supercell and  $4\times 4\times 1$  graphene supercell for (a) Rb and (b) Cs.
